# Supplementary material for: Enhanced hyperthermic properties of biocompatible zinc ferrite nanoparticles with a charged polysaccharide coating
Source: Royal Society of Chemistry journal article supplement (doi:10.1039/c9tb00029a), 2019-01-01
Supplement: c9tb00029a1.pdf [file c9tb00029a1.pdf]

## SUPPORTING INFORMATION

# Enhanced hyperthermic properties of biocompatible zinc ferrite nanoparticles with charged polysaccharide coating

*Dorota Lachowicz,<sup>a,‡</sup> Weronika Górka,<sup>b,c,‡</sup> Angelika Kmita,<sup>a</sup> Andrzej Bernasik,<sup>d</sup> Jan Żukrowski,<sup>a</sup>  
Wojciech Szczerba,<sup>a</sup> Marcin Sikora,<sup>a</sup> Czesław Kapusta,<sup>d</sup> Szczepan Zapotoczny<sup>b\*</sup>*

<sup>a</sup>AGH University of Science and Technology, Academic Centre for Materials and Nanotechnology, al. A. Mickiewicza 30, 30-059 Krakow, Poland

<sup>b</sup>Faculty of Chemistry, Jagiellonian University, Gronostajowa 2, 30-387 Krakow, Poland

<sup>c</sup>Faculty of Physics, Astronomy and Applied Computer Science, Jagiellonian University, prof. Stanisława Łojasiewicza 11, 30-348 Krakow, Poland

<sup>d</sup>AGH University of Science and Technology, Faculty of Physics and Applied Computer Science, al. A. Mickiewicza 30, 30-059 Krakow, Poland

<sup>‡</sup>These authors equally contributed to the manuscript

Corresponding author email: [zapotocz@chemia.uj.edu.pl](mailto:zapotocz@chemia.uj.edu.pl)

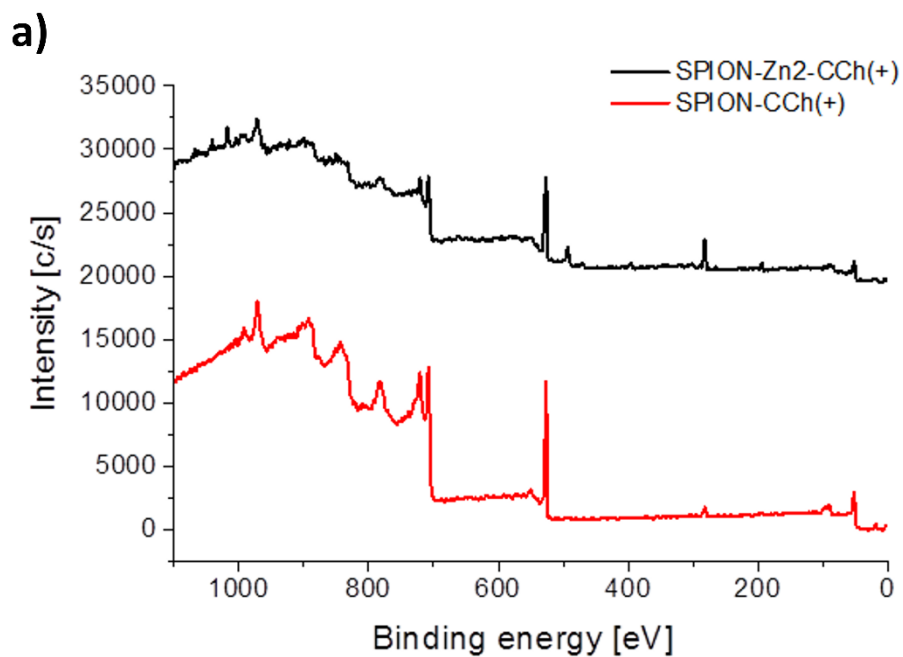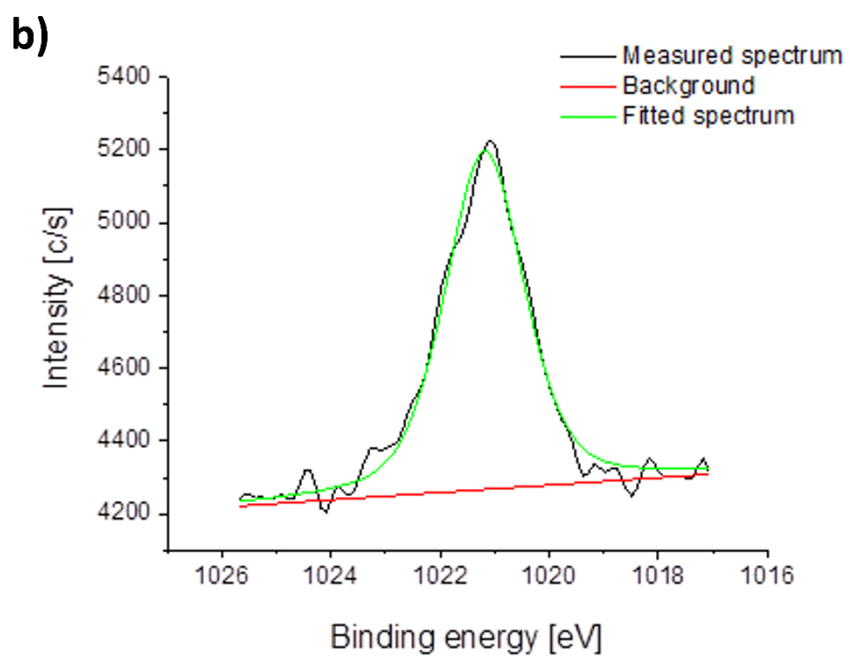

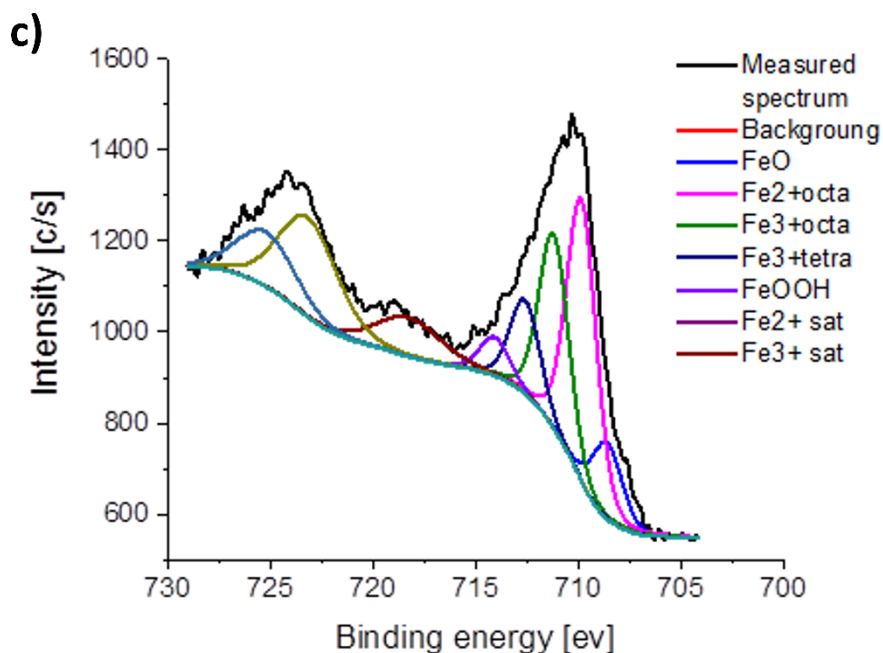

**Figure S1.** The XPS spectra of: (a) SPION-CCh(+) and SPION-Zn2-CCh(+), (b) Zn 2p<sub>3/2</sub> band of SPION-Zn2-CCh(+); (c) deconvoluted Fe 2p band of SPION-Zn2-CCh(+).

**Table S1.** Elemental composition of the nanoparticles based on XPS measurements.

| Samples                 | C1s  | N1s | O1s  | Fe2p3 | Zn2p3 | Zn/Fe       |
|-------------------------|------|-----|------|-------|-------|-------------|
| <b>SPION-Zn</b>         | 12.4 | 0.3 | 64.4 | 20.1  | 2.8   | <b>0.14</b> |
| <b>SPION</b>            | 13.5 | 0.2 | 65.8 | 20.5  | 0.0   | <b>0.00</b> |
| <b>SPION-CCh(+)</b>     | 42.5 | 4.4 | 40.6 | 12.5  | 0.0   | <b>0.00</b> |
| <b>SPION-Zn1-CCh(+)</b> | 31.5 | 2.1 | 51.3 | 13.8  | 1.3   | <b>0.10</b> |
| <b>SPION-Zn2-CCh(+)</b> | 36.5 | 3.5 | 48.4 | 9.6   | 2.0   | <b>0.21</b> |
| <b>SPION-Zn3-CCh(+)</b> | 53.7 | 4.5 | 35.1 | 5.5   | 1.3   | <b>0.23</b> |

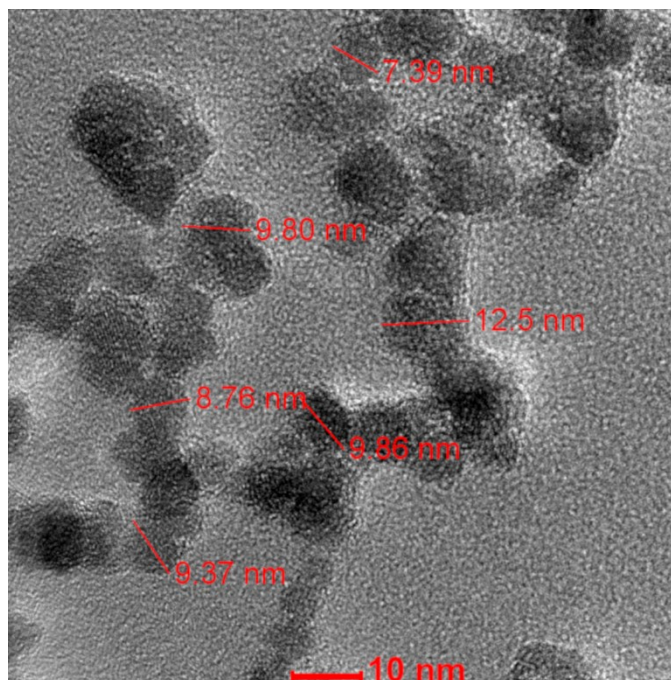

**Figure S2.** The exemplary HR TEM image for SPION-CCh(+).

a)

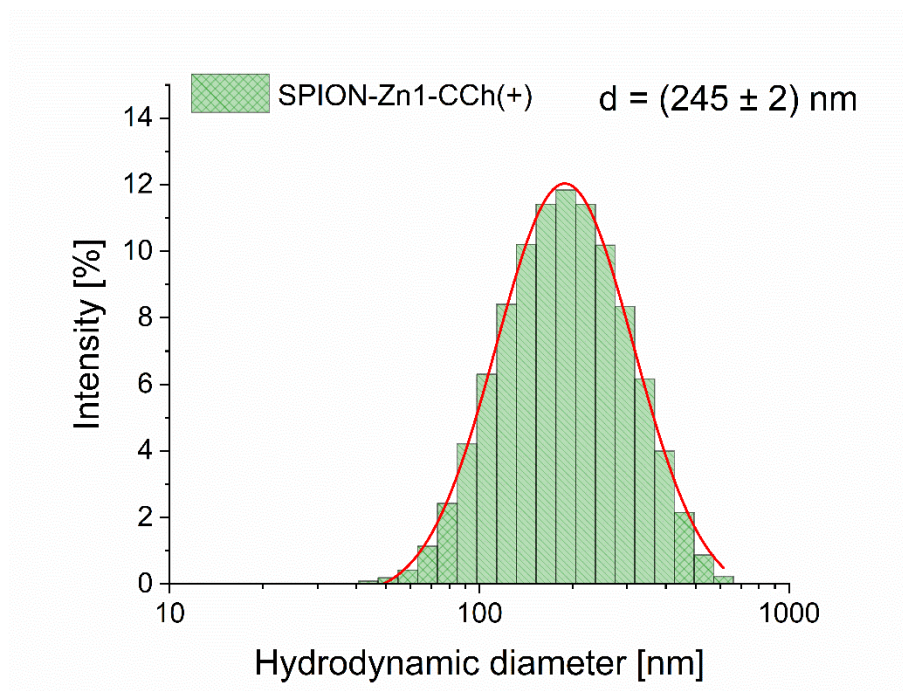

b)

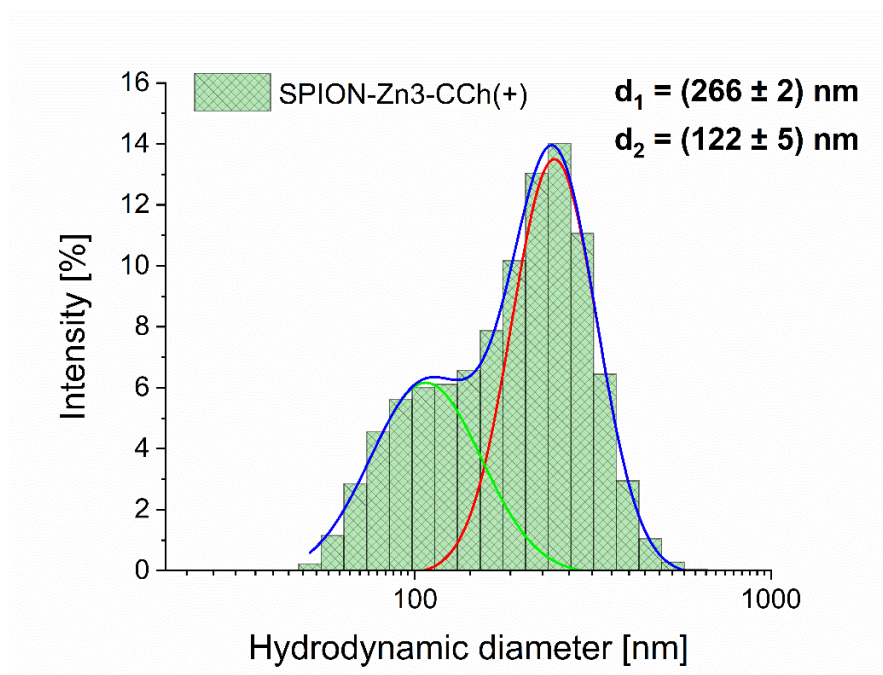

**Figure S3.** Size distributions by intensity of SPION-Zn1-CCh(+) (a) and SPION-Zn3-CCh(+) (b) as measured via DLS.

a)

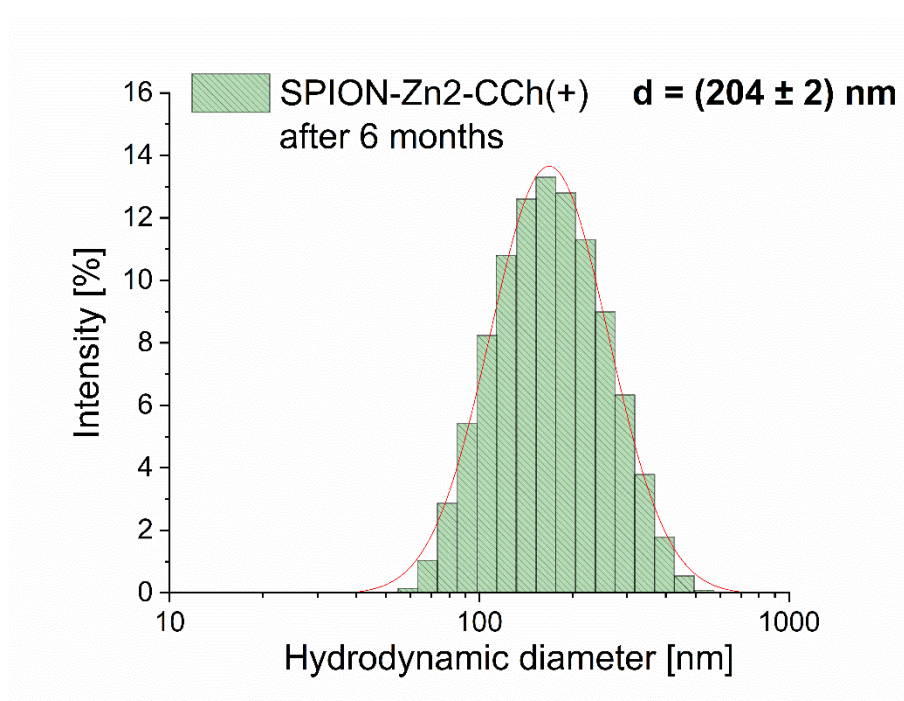

b)

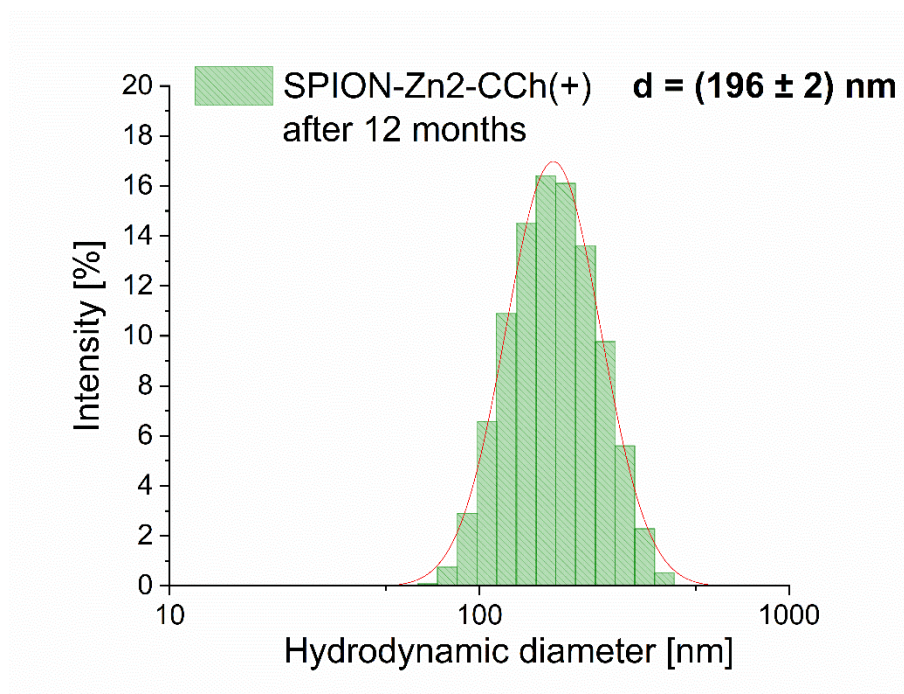

**Figure S4.** Size distributions by intensity of SPION-Zn<sub>2</sub>-CCh(+) after 6 months (a) and after 12 months (b) as measured via DLS.

a)

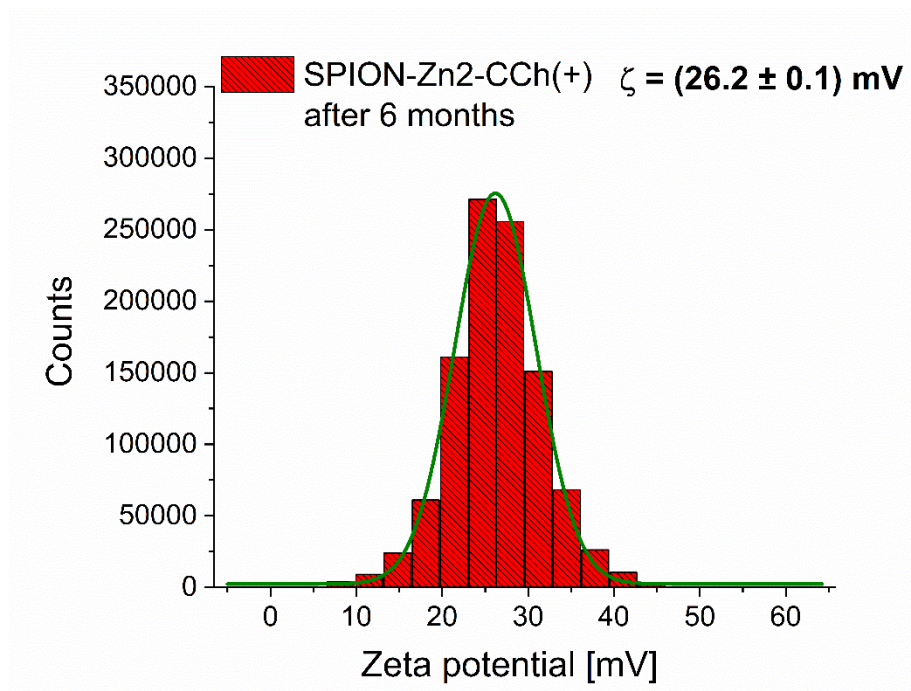

b)

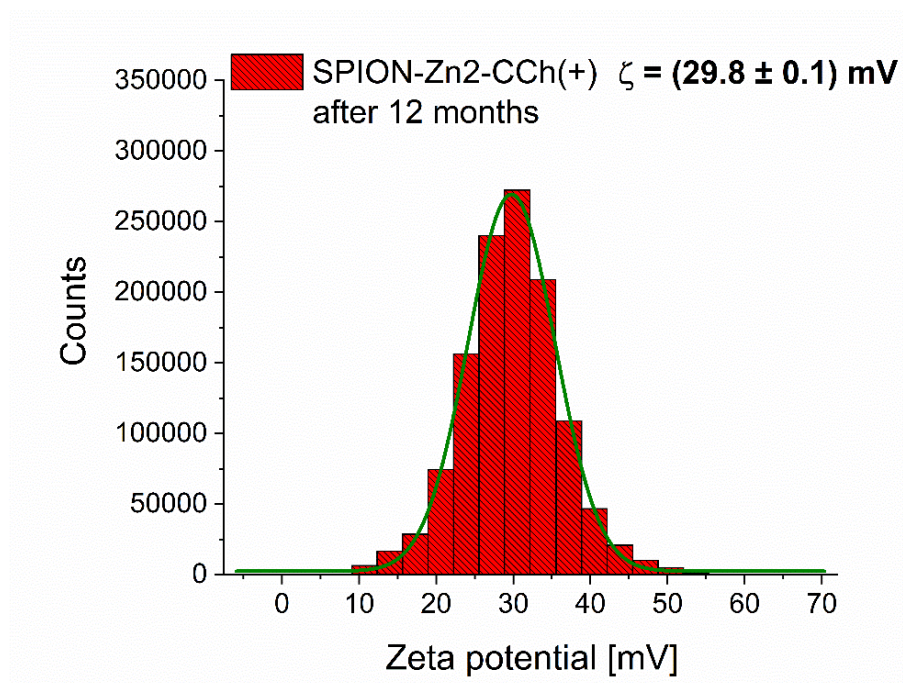

**Figure S5.** Zeta potential values of SPION-Zn<sub>2</sub>-CCh(+) after 6 months (a) and after 12 months (b).

**Table S2.** Mössbauer parameters for SPION-Zn2-CCh(+) nanoparticles: component contribution (Contrib.), isomer shift (IS) relative to  $^{57}\text{Co}(\text{Rh})$ , magnetic hyperfine field (H), quadrupole splitting (QS).

|                                                                                     | No | Contrib.<br>[%] | IS<br>[mm/s] | H [kGs] | QS [mm/s] |
|-------------------------------------------------------------------------------------|----|-----------------|--------------|---------|-----------|
| <b>T = 80K</b>                                                                      | 1  | 28.9            | 0.374        | 493.3   | 0.017     |
|                                                                                     | 2  | 26.5            | 0.362        | 466.2   | -0.123    |
|                                                                                     | 3  | 29.0            | 0.256        | 482.1   | -0.007    |
|                                                                                     | 4  | 15.6            | 0.504        | 427.6   | -0.023    |
| $\langle \text{IS} \rangle = 0.357$ [mm/s] $\langle \text{H} \rangle = 472.6$ [kGs] |    |                 |              |         |           |

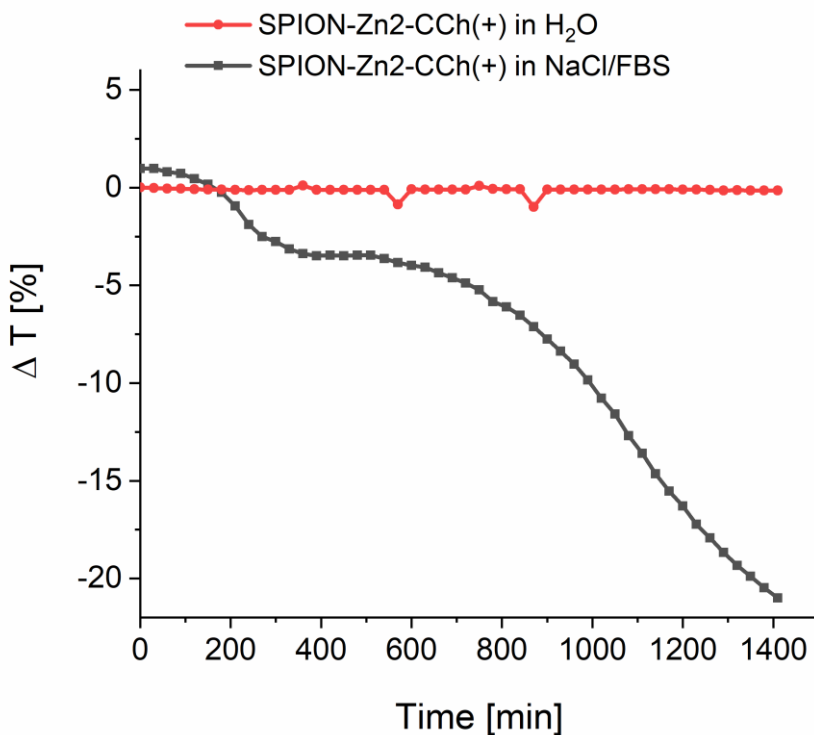

**Figure S6.** Variations of transmission of the dispersions of SPION-Zn2-CCh(+) in water (red) and serum solution (black) measured by Turbiscan analyzer.



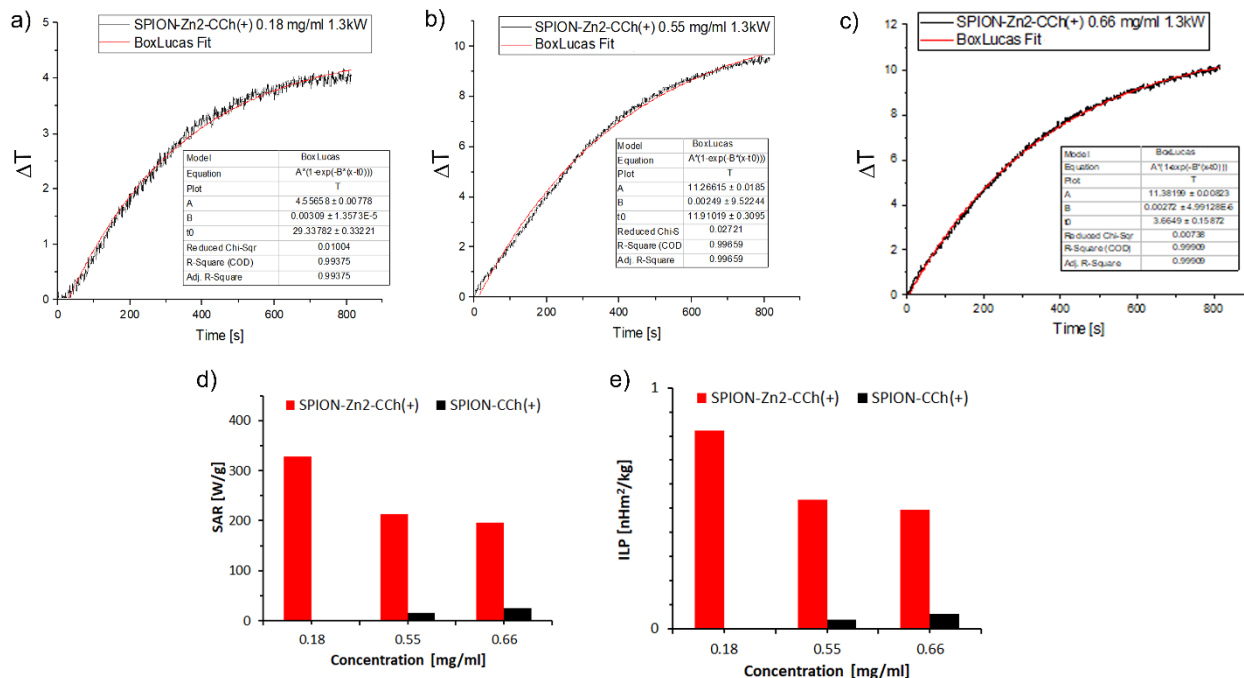

**Figure S7.** Example temperature rise profiles as a function of time resulted from the hyperthermic experiments and the respective fitting using the Box-Lucas model for SPION-Zn2-CCh(+) dispersions at the fixed power (1.3 kW) for three concentrations of iron (0.18, 0.55 and 0.66 mg/mL) (a-c); the red lines represent fitting of the data with the Box–Lucas curve (eq. 2); (d-e) SAR and ILP values calculated based on the Box-Lucas method.

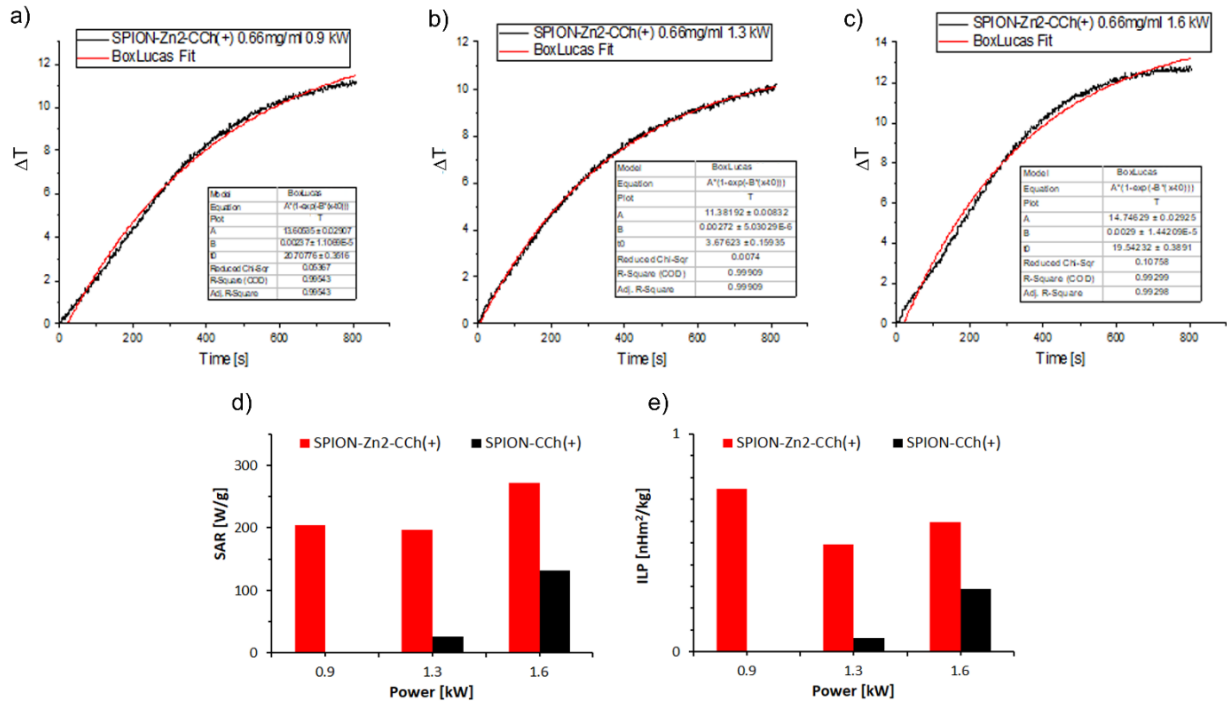

**Figure S8.** Example temperature rise profiles as a function of time resulted from the hyperthermic experiments and the respective fitting using the Box-Lucas model for SPION-Zn<sub>2</sub>-CCh(+) dispersions at various generator powers (0.9, 1.3, 1.6 kW) for the concentration of iron equal to 0.66 mg/mL (a-c); the red lines represent fitting of the data with the Box-Lucas curve (eq. 2); (d-e) SAR and ILP values calculated based on the Box-Lucas method.
